# Supplementary material for: Sensitive impedimetric detection of troponin I with metal–organic framework composite electrode
Source: Royal Society of Chemistry journal article supplement (doi:10.1039/d0ra06665f), 2021-01-01
Supplement: d0ra06665f1.pdf [file d0ra06665f1.pdf]

# Supplementary Information

## Sensitive Impedimetric Detection of Troponin I with Metal-Organic Framework Composite Electrode

Arushi Gupta<sup>1,2</sup>, Sandeep Kumar Sharma<sup>3</sup>, Vivek Pachauri<sup>4</sup>, Sven Ingebrandt<sup>4</sup>, Suman Singh<sup>1</sup>, Amit L Sharma<sup>1,2</sup>, Akash Deep<sup>1,2\*</sup>

<sup>1</sup>Central Scientific Instruments Organisation (CSIR-CSIO), Sector 30-C, Chandigarh, India;

<sup>2</sup>Academy of Scientific and Innovative Research (AcSIR-CSIO), Ghaziabad-201002,

Chandigarh, India; <sup>3</sup>Department of Physics, Sri Guru Gobind Singh College, Sector 26,

Chandigarh, India; <sup>4</sup>IWE1 –Institut für Werkstoffe der Elektrotechnik1, RWTH Aachen

University, Germany

**Correspondence:** *dr.akashdeep@csio.res.in (AD)*

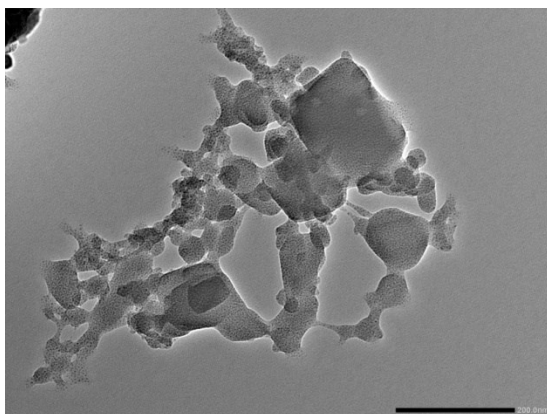

Figure S1. TEM image of Cu<sub>3</sub>(BTC)<sub>2</sub>

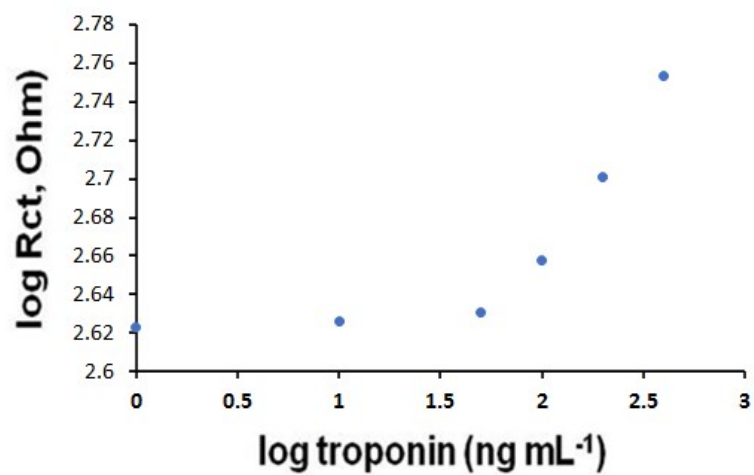

Figure S2. Detection of cTnI with a reference Ab/PANI biosensor, the sensor did not produce any discernible response below 50 ng/mL
